# Supplementary material
Source: PubMed Central journal article supplement (PMC5690820)
Supplement: NIHMS900674-supplement-1.pdf [file NIHMS900674-supplement-1.pdf]

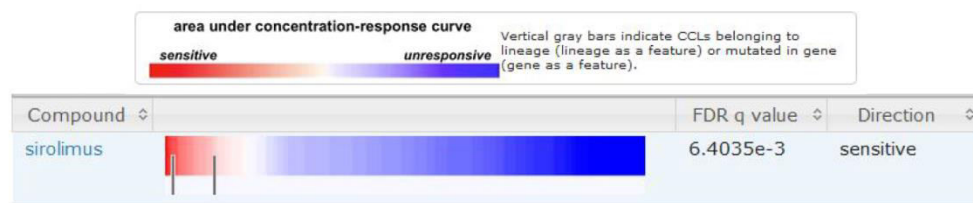

**Supplementary Figure S1. Mutations in *CCND3* increase sensitivity to mTOR inhibition.**

Enrichment analysis showing increased sensitivity of cancer lines with mutations in *CCND3* to an mTOR inhibitor, sirolimus. Data are from the Cancer Therapeutics Response Portal (<http://portals.broadinstitute.org/ctrp/>).

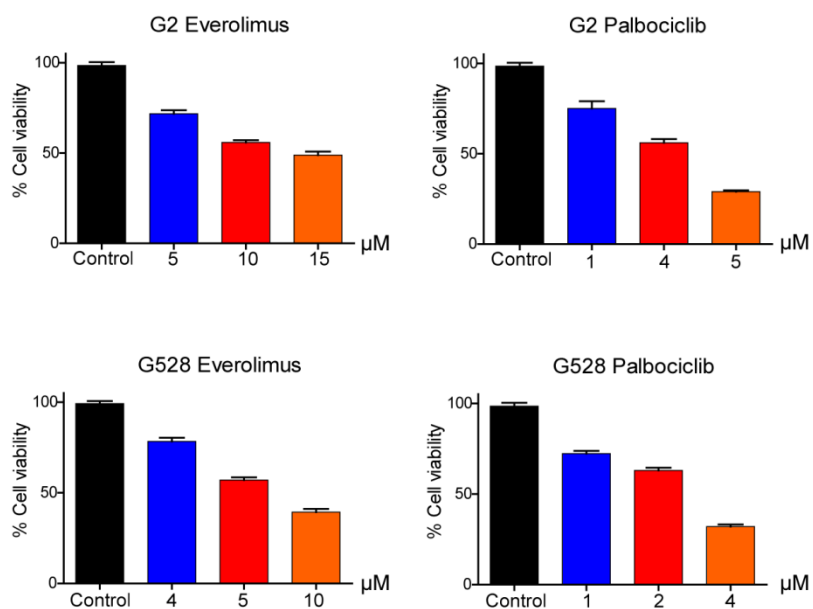

**Supplementary Figure S2. Dose-response plots for everolimus and palbociclib.** G2 and G528 lines show sensitivity to both palbociclib and everolimus in a dose-dependent manner.

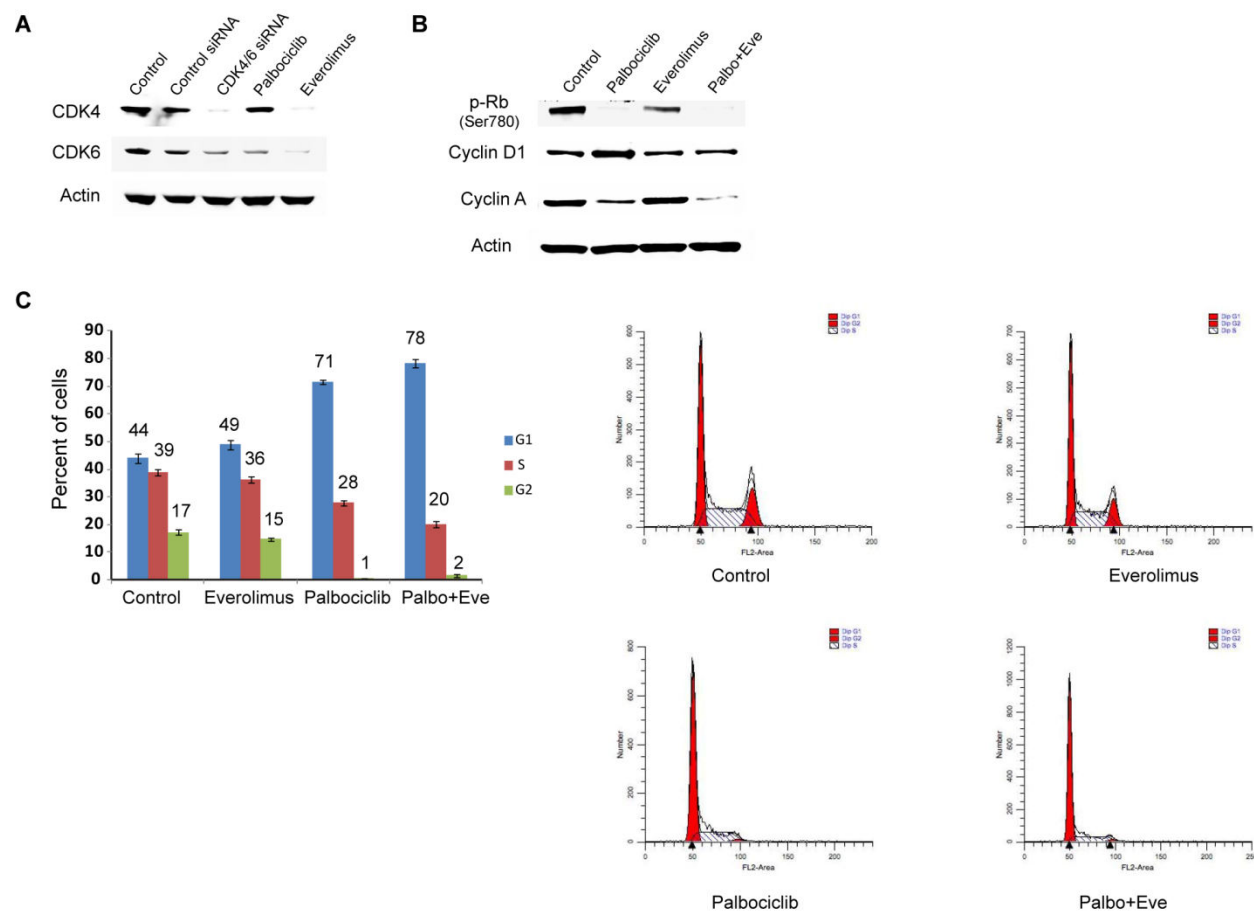

**Supplementary Figure S3. mTOR inhibition with everolimus cross-regulates the CDK/Rb pathway.** (A-B) Shown are immunoblots using specific antibodies for CDK4, CDK6, Cyclin D1, Cyclin A, and p-Rb. (C) Cell cycle analysis of G2 cells following 24 hours of treatment with palbociclib, everolimus, and the combination of both.

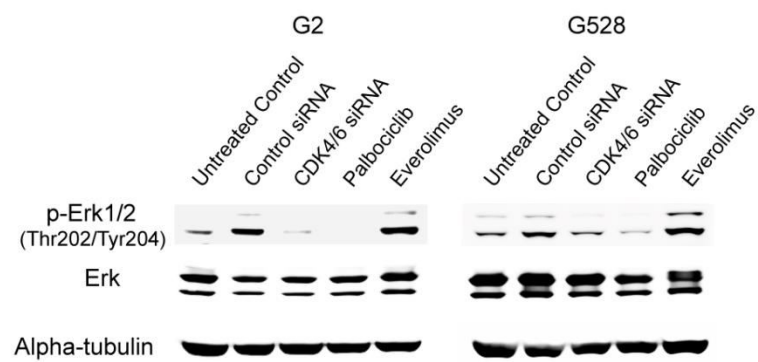

**Supplementary Figure S4. Erk activity is linked to CDK4/6 inhibition.** Shown are immunoblots using specific antibodies against p-Erk and Erk.

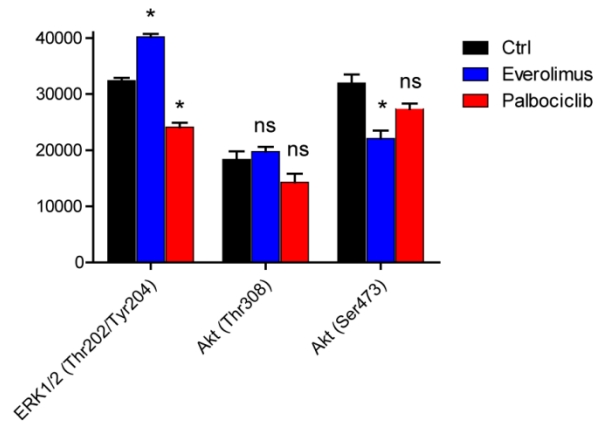

**Supplementary Figure S5. Palbociclib treatment decreases the phosphorylation of Erk1/2.**

Antibody array (ELISA) results with antibodies specific for p-Erk, p-Akt (Thr308), and p-Akt (Ser473) are plotted (\* $P < 0.05$ ; one-way ANOVA with post-hoc Tukey analysis. Values are mean  $\pm$  SEM of triplicates).

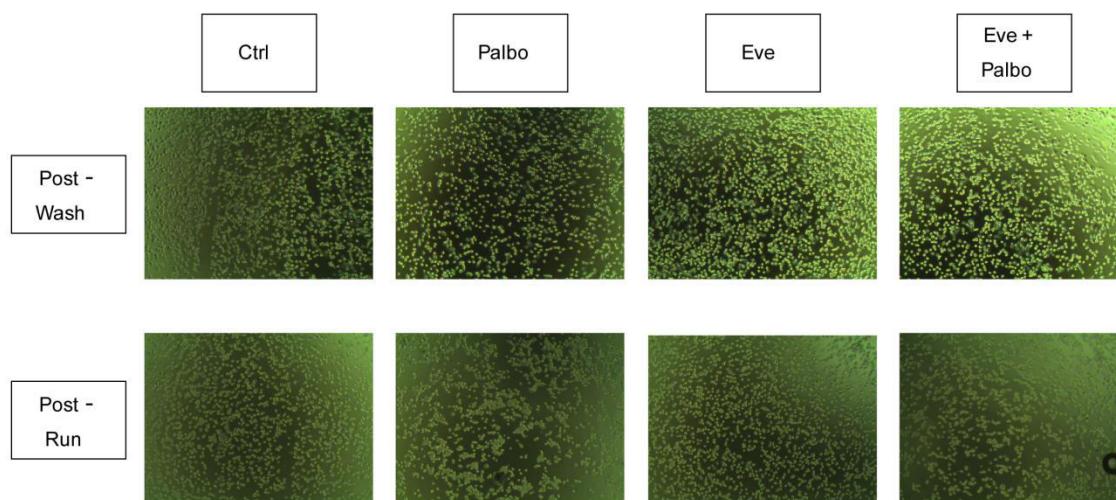

**Supplementary Figure S6. Cells remain attached throughout the Seahorse metabolic assays.**

Shown are images taken after the washing processes and at the end of the metabolic assays.

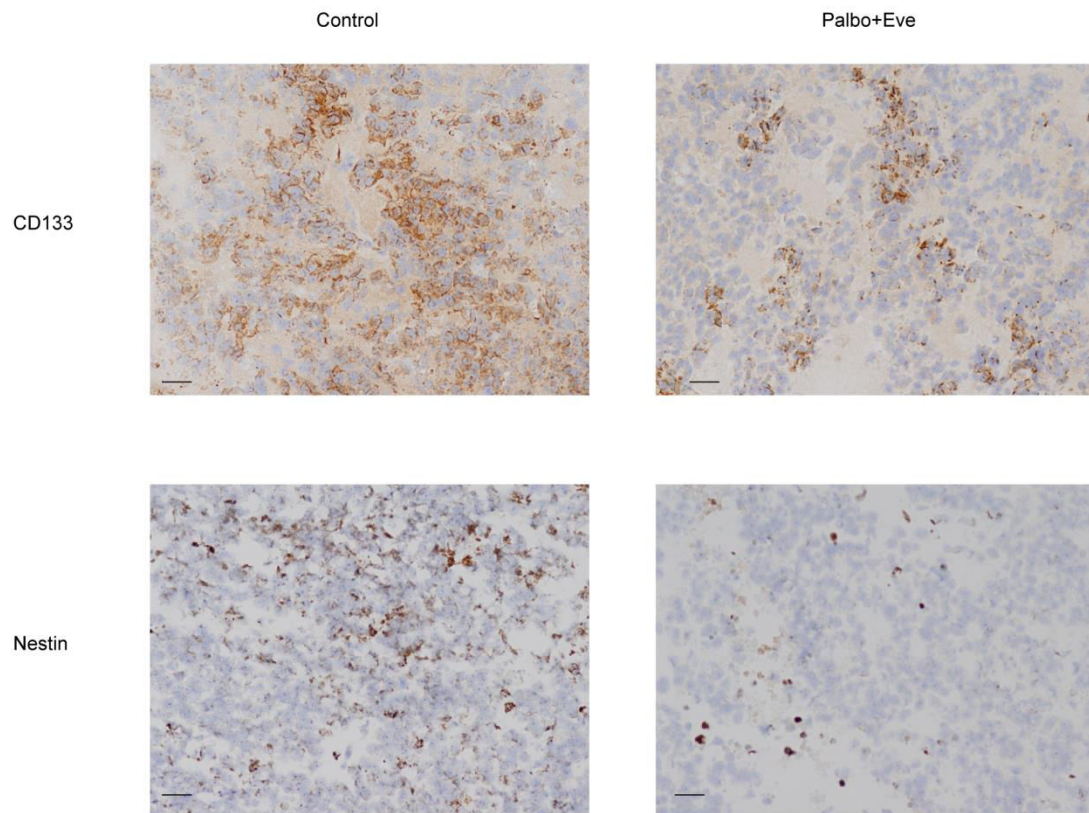

**Supplementary Figure S7. Immunohistochemistry staining of tumor harboring mouse brains for GIC markers.** Both CD133 and nestin expression is less in the combination treatment group vs. control. Scale bar: 5  $\mu$ m.
